# Supplementary material for: Treatment of ErbB2 breast cancer by mitochondrial targeting
Source: PubMed Central journal article supplement (PMC7362624; doi:10.1186/s40170-020-00223-8), 2020-07-14

## **LEGENDS TO SUPPLEMENTAL FIGURES**

### **Figure 1. Growth inhibition of ErbB2 breast cancer cells by mitochondrial complex I inhibitors.**

AU565 (A) and BT474 (B) cells were grown in DMEM medium and treated for 96h as indicated. Cell growth (O.D 630) Mean  $\pm$  SD.

### **Figure 2. Growth inhibition of A549 cancer cells by mitochondrial complex I inhibitors.**

A549 cells were grown in DMEM medium and treated for 96h as indicated. Cell growth (O.D 630) Mean  $\pm$  SD.

# Supp Figure 1

**A**

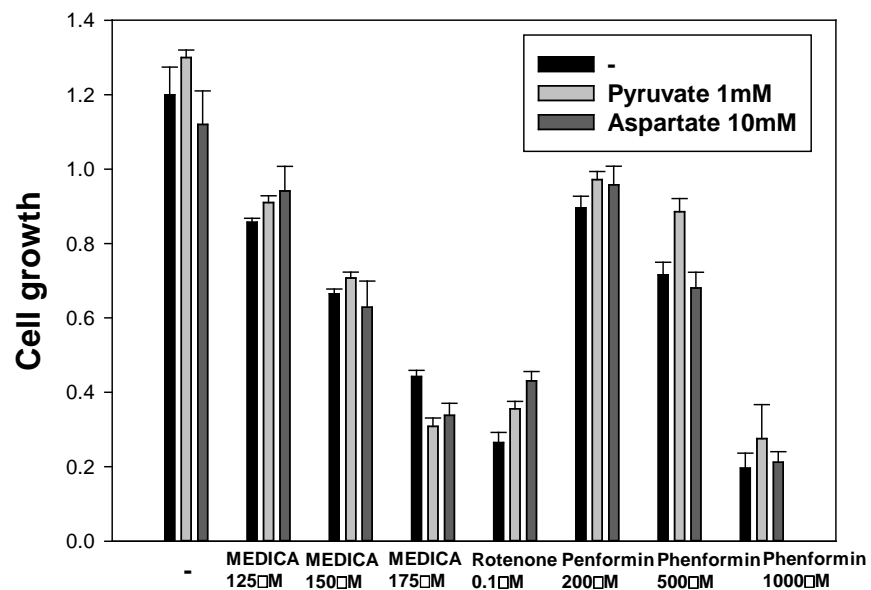

**B**

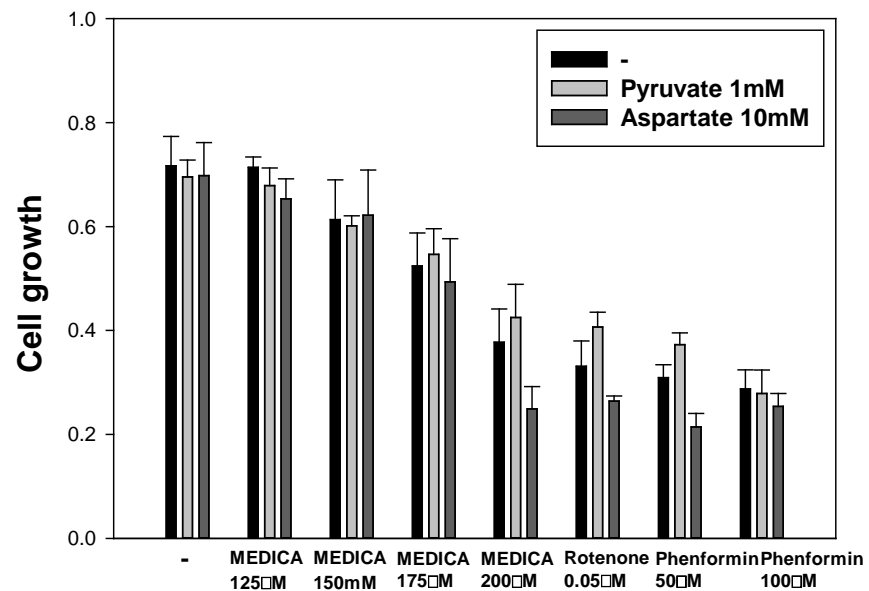

## Supp Figure 2

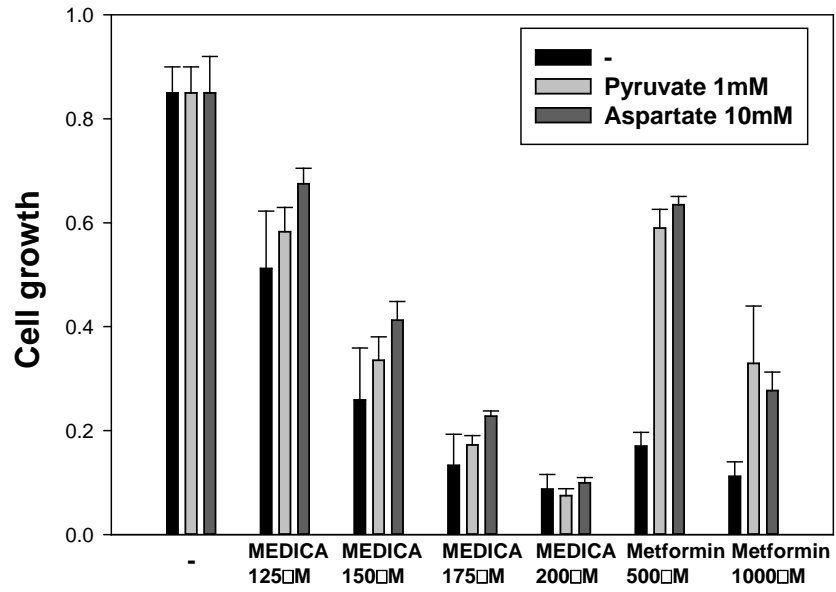

Supplement: 40170_2020_223_MOESM1_ESM.pdf [file 40170_2020_223_MOESM1_ESM.pdf]
